# Supplementary material for: A pilot study of metabolites of organophosphorus flame retardants in paired maternal urine and amniotic fluid samples: potential exposure risks of tributyl phosphate to pregnant women
Source: Royal Society of Chemistry journal article supplement (doi:10.1039/c8em00389k), 2018-11-05
Supplement: c8em00389k1.pdf [file c8em00389k1.pdf]

## Supplementary data

### **A Pilot Study of Metabolites of Organophosphorus Flame Retardants in Paired Maternal Urine and Amniotic Fluid Samples: Potential Exposure Risks of Tributyl Phosphate to Pregnant Women**

Xue-yuan Bai<sup>a,b#</sup>, Shao-you Lu<sup>c#</sup>, Lei Xie<sup>a</sup>, Bo Zhang<sup>a</sup>, Shi-ming Song<sup>a</sup>, Yuan He<sup>a</sup>, Ji-ping Ouyang<sup>a</sup>, Tao Zhang<sup>a,b\*</sup>

<sup>a</sup> School of Environmental Science and Engineering, Sun Yat-Sen University, Guangzhou 510275, China

<sup>b</sup> Guangdong Provincial Key Laboratory of Environmental Pollution Control and Remediation Technology (Sun Yat-Sen University), Guangzhou 510275, China

<sup>c</sup> Shenzhen Center for Disease Control and Prevention, Shenzhen 518055, PR China

#These authors contributed to this work equally

**\*Corresponding author:**

**Tao Zhang**

**School of Environmental Science and Engineering, Sun Yat-Sen University**

**135 Xingang West Street, Guangzhou, 510275, China**

**Tel: 86-22-84113454**

**E-mail: zhangt47@mail.sysu.edu.cn**

**Submission to: Environmental Science: Processes & Impact**

**Table S1**  
**Optimized MS/MS parameters for target organophosphate metabolites.**

| Metabolites                                   | Parent compounds                                                    | Precursor ion (Q1) | Product ion (Q3) | DP <sup>a</sup> (V) | EP <sup>b</sup> (V) | CE <sup>c</sup> (V) | CXP <sup>d</sup> (V) |
|-----------------------------------------------|---------------------------------------------------------------------|--------------------|------------------|---------------------|---------------------|---------------------|----------------------|
| <b>Native standards</b>                       |                                                                     |                    |                  |                     |                     |                     |                      |
| bis(1,3-dichloro-2-propyl) phosphate (BDCIPP) | tris(1,3-dichloro-2-propyl) phosphate (TDCIPP)                      | 318.9              | 35.0             | -53                 | -4.5                | -46                 | -11                  |
| bis(2-butoxyethyl) phosphate (BBOEP)          | tris(2-butoxyethyl) phosphate (TBOEP)                               | 305.0              | 79.0             | 70                  | -8                  | -40                 | -15                  |
| dibutyl phosphate (DBP)                       | tri- <i>n</i> -butyl phosphate (TNBP)                               | 209.0              | 78.9             | -80                 | -7                  | -30                 | -15                  |
| di- <i>o</i> -cresyl phosphate (DoCP)         | tricresyl phosphate (TCP)                                           | 227.1              | 107.0            | -80                 | -6                  | -33                 | -17                  |
| di- <i>p</i> -cresyl phosphate (DpCP)         |                                                                     | 227.1              | 107.0            | -80                 | -8                  | -32                 | -15                  |
| diphenyl phosphate (DPHP)                     | triphenyl phosphate (TPHP)<br>ethylhexyl diphenyl phosphate (EHDPP) | 249.1              | 93.0             | -100                | -7                  | -45                 | -9                   |
| <b>internal standards</b>                     |                                                                     |                    |                  |                     |                     |                     |                      |
| d <sub>10</sub> -BDCIPP                       |                                                                     | 329.0              | 35.0             | -90                 | -10                 | -60                 | -17                  |
| d <sub>8</sub> -BBOEP                         |                                                                     | 305.0              | 79.0             | -90                 | -7                  | -60                 | -10                  |
| d <sub>18</sub> -DBP                          |                                                                     | 227.3              | 79.0             | -80                 | -8                  | -50                 | -10                  |
| d <sub>14</sub> -DoCP                         |                                                                     | 291.1              | 114.0            | -90                 | -7                  | -40                 | -10                  |
| d <sub>14</sub> -DpCP                         |                                                                     | 291.1              | 114.0            | -120                | -7                  | -36                 | -10                  |
| d <sub>10</sub> -DPHP                         |                                                                     | 259.2              | 98.0             | -90                 | -8                  | -32                 | -12                  |

a DP = declustering potential.

b EP = entrance potential.

c CE = collision energies.

d CXP = collision cell exit potential.

**Table S2****Parameters Used for Calculation of Total Daily Intakes of OPs in China.**

|                                                                   | TPHP              | TnBP              |
|-------------------------------------------------------------------|-------------------|-------------------|
| molecular weights of the parent OPs (MWp, g/mol)                  | 326               | 266               |
| molecular weights of the metabolite of OPs (MWm, g/mol)           | 250               | 210               |
| $F_{UE}$ based on in vitro human liver microsome (HLM) experiment | 0.09 <sup>a</sup> | 0.18 <sup>b</sup> |
| $F_{UE}$ based on in vitro human liver S9 fraction experiment     | 0.04 <sup>a</sup> | 0.18 <sup>b</sup> |

<sup>a</sup>  $F_{UE}$  is the urinary excreted molar fraction of metabolite with respect to its parent compound, data from Van den Eede et al. <sup>b</sup>  $F_{UE}$  of TnBP was from TnBP metabolism experiment of male rats from Suzuki et al.
